# Supplementary material
Source: PubMed Central journal article supplement (PMC3281602)
Supplement: supp_M111.315598_jbc.M111.315598-1.pdf [file supp_M111.315598_jbc.M111.315598-1.pdf]

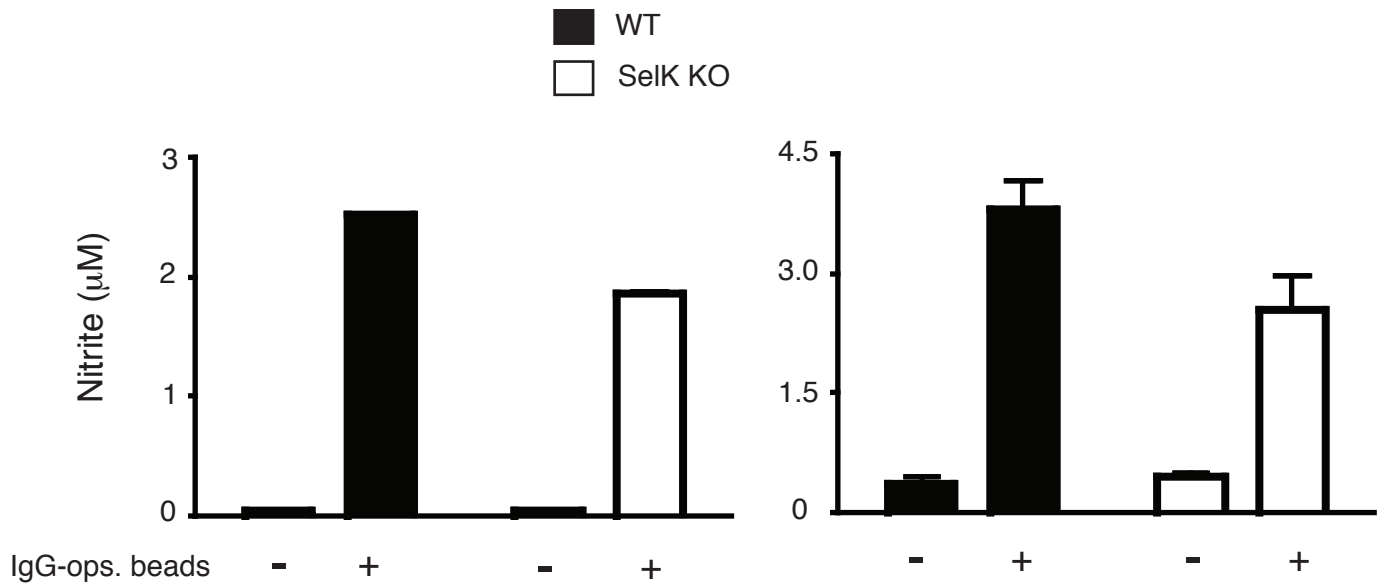

**Figure S1.** A comparison between two techniques that detect nitrite as a measurement of NO. IgG-ops. beads were added for 20 h or not added as a negative control, and the supernatants analyzed for levels of nitrite as a measure of NO. The left graph represents results from an experiment using a sensitive fluorometric assay, while the right graph represents results using a standard Greiss reaction to detect nitrite levels. Results differed on overall levels, but the effect of WT versus SelK KO were similar.
